# Supplementary material for: Pseudohyphal differentiation in Komagataella phaffii: investigating the FLO gene family
Source: PubMed Central journal article supplement (PMC7419694; doi:10.1093/femsyr/foaa044), 2020-08-07
Supplement: foaa044_supplemental_file.pdf [file foaa044_supplemental_file.pdf]

**Supplementary File to**

**Pseudohyphal differentiation in *Komagataella phaffii*: investigating  
the *FLO* gene family**

De Sonakshi, Rebnegger Corinna, Moser Josef, Tatto Nadine, Graf Alexandra B,  
Mattanovich Diethard, Gasser Brigitte

## Supplementary tables

**Table S1. Members of the *K. phaffii* FLO gene family**

The following table lists the names of all annotated *FLO* genes and additional genes that show low similarity to flocculins, along with their feature names and identified conserved domains

| <b>Gene name</b>               | <b>Feature</b>   | <b>Conserved domains</b>                             |
|--------------------------------|------------------|------------------------------------------------------|
| <b><i>FLO11</i></b>            | PP7435_Chr2-0267 | FLO11 domain, Flocculin type 3 repeat                |
| <b><i>FLO5-1</i></b>           | PP7435_Chr3-1389 | PA14/GLEYA domain, Flocculin type 3 repeat           |
| <b><i>FLO5-2</i></b>           | PP7435_Chr1-1228 | PA14/GLEYA domain, Herpes BLLF1                      |
| <b><i>FLO100</i></b>           | PP7435_Chr1-1587 | PA14/GLEYA domain                                    |
| <b><i>FLO200</i></b>           | PP7435_Chr3-1226 | PA14/GLEYA domain                                    |
| <b><i>FLO300</i></b>           | PP7435_Chr4-1020 | PA14/GLEYA domain                                    |
| <b><i>FLO400</i></b>           | PP7435_Chr4-0865 | Flocculin type 3 repeat                              |
| <b><i>FLO8</i></b>             | PP7435_Chr4-0252 | LiSH domain                                          |
| <b><i>BSC1</i></b>             | PP7435_Chr1-1549 | FLO11 domain, Cellulose Binding Domain, Herpes BLLF1 |
| <b><i>PP7435_Chr1-2104</i></b> | PP7435_Chr1-2104 | Flocculin type 3 repeat                              |
| <b><i>PP7435_Chr3-1237</i></b> | PP7435_Chr3-1237 | Flocculin type 3 repeat                              |
| <b><i>PP7435_Chr4-0629</i></b> | PP7435_Chr4-0629 | Herpes BLLF1                                         |
| <b><i>PP7435_Chr4-1013</i></b> | PP7435_Chr4-1013 | PA14/GLEYA domain, Flocculin type 3 repeat           |
| <b><i>PP7435_Chr2-0004</i></b> | PP7435_Chr2-0004 | None identified                                      |

**Table S2. RNA-Seq data for *FLO* genes when *K. phaffii* CBS7435 is grown in standard M2 medium supplemented with 5 g/L glucose (Ata Ö et al. 2018)**

| <b>ID</b>        | <b>Gene name</b> | <b>Wild type average tpm</b> |
|------------------|------------------|------------------------------|
| PP7435_Chr2-0267 | <i>FLO11</i>     | 1.1                          |
| PP7435_Chr1-1389 | <i>FLO5-1</i>    | 300.6                        |
| PP7435_Chr4-0865 | <i>FLO400</i>    | 25.7                         |
| PP7435_Chr1-1549 | <i>BSC1</i>      | 9.1                          |
| PP7435_Chr3-1228 | <i>FLO5-2</i>    | 118.3                        |
| PP7435_Chr1-1587 | <i>FLO100</i>    | 0.0                          |
| PP7435_Chr3-1226 | <i>FLO200</i>    | 58.0                         |
| PP7435_Chr4-1020 | <i>FLO300</i>    | 176.5                        |
| PP7435_Chr1-2104 | PP7435_Chr1-2104 | 568.9                        |
| PP7435_Chr3-1237 | PP7435_Chr3-1237 | 224.7                        |
| PP7435_Chr2-0004 | PP7435_Chr2-0004 | 17.7                         |
| PP7435_Chr4-0629 | PP7435_Chr4-0629 | 337.6                        |
| PP7435_Chr4-1013 | PP7435_Chr4-1013 | 395.1                        |
| PP7435_Chr4-0252 | <i>FLO8</i>      | 3.1                          |
| PP7435_Chr3-0993 | <i>ACT1</i>      | 182.5                        |

**Table S3. Genes that are significantly up- or downregulated (criteria adjusted p-value<0.05; log<sub>2</sub> fold-change below -1 or above 1) in the *K. phaffii* wild-type strain compared to the *flo8Δ* strain identified by RNA-Seq**

| CATEGORY             | GENES                                                                                                                                                                                                                                                                                                                                                                                                                                                                                                                                                                                                                                                                                                                                                                                                                                                                                                                                                                                                                                                                                                                                                                                                                                                                                      |
|----------------------|--------------------------------------------------------------------------------------------------------------------------------------------------------------------------------------------------------------------------------------------------------------------------------------------------------------------------------------------------------------------------------------------------------------------------------------------------------------------------------------------------------------------------------------------------------------------------------------------------------------------------------------------------------------------------------------------------------------------------------------------------------------------------------------------------------------------------------------------------------------------------------------------------------------------------------------------------------------------------------------------------------------------------------------------------------------------------------------------------------------------------------------------------------------------------------------------------------------------------------------------------------------------------------------------|
| <b>Upregulated</b>   | <p><i>PP7435_Chr1-0004, PHM7, IME2, HSP104, RIM4, MRN1, PP7435_Chr1-0172, PP7435_Chr1-0236, FAR1, PP7435_Chr1-0252, GPA1, PP7435_Chr1-0483, STE4, MIH1, SOR1, PRM1, ADH7, ADY2-4, HAC1, RME1, CHS7, PBP2, PP7435_Chr1-0819, FIG1, TPO3, PP7435_Chr1-1005, PP7435_Chr1-1074, URC1, PP7435_Chr1-1116, PP7435_Chr1-1117, PMP3-2, CWC21, PP7435_Chr1-1165, MNN14, PP7435_Chr1-1233, PP7435_Chr1-1387, PP7435_Chr1-1388, FLO5-1, PP7435_Chr1-1393, PpBMT3, SOA1 , PP7435_Chr1-1482, PP7435_Chr1-1496, GTT1, PP7435_Chr2-0218, FLO11, PDR15, PP7435_Chr2-0355, MF(ALPHA)1, MNN4-3, PP7435_Chr2-0638, FUS3, EXG1, PP7435_Chr2-0908, AOC1-1, GSC2, PP7435_Chr2-1044, PP7435_Chr2-1097, PTP2, MSC1, PP7435_Chr2-1246, PP7435_Chr2-1294, QUP4, PP7435_Chr2-2001, PP7435_Chr2-2705, DLD1, ALD6-2, YPS1-5, STE6-1, AGP2-2, SST2, PP7435_Chr3-0415, AQY1, PP7435_Chr3-0480, RAM1, TOS8, PP7435_Chr3-0762, PP7435_Chr3-0863, SSA3, PP7435_Chr3-1213, AYP1, SOA1, ALS3, PP7435_Chr3-1237, STE3, PP7435_Chr3-1710, FMP45, MATalpha1, PP7435_Chr4-0101, PP7435_Chr4-0336, HSP12, PP7435_Chr4-0344, KAR4, PP7435_Chr4-0631, PP7435_Chr4-0632, PP7435_Chr4-0690, PP7435_Chr4-0827, FLO400, STE2, PP7435_Chr4-0976, PP7435_Chr4-1001, PP7435_Chr4-1007, FET4-2, OPT1-1, MATa2, PP7435_Chr4-1576, STE12</i></p> |
| <b>Downregulated</b> | <p><i>PEX11C, PMP20, PMP3-1, TRS23, PP7435_Chr2-0423, PP7435_Chr2-0527, PP7435_Chr2-1495, COX9, PP7435_Chr2-1968, ATP15, PP7435_Chr2-2540, SIT1-1, FMO1-2, MUP1-2, PP7435_Chr3-1224, PP7435_Chr3-1545, AOX1, TMA10, PP7435_Chr4-1014, RKI1-2, NU4M</i></p>                                                                                                                                                                                                                                                                                                                                                                                                                                                                                                                                                                                                                                                                                                                                                                                                                                                                                                                                                                                                                                 |

**Table S4. Enriched GO terms for genes showing differential regulation in the *flo8Δ* strain compared to the wild-type strain**

| <b>GO Term</b>                                    | <b>Genes</b>                                                                                                                                                                                                                                                                                                                                                                                                                                                                                                                                                                                                                                                                                                                                                                                                                                                                                                                                                                                                              |
|---------------------------------------------------|---------------------------------------------------------------------------------------------------------------------------------------------------------------------------------------------------------------------------------------------------------------------------------------------------------------------------------------------------------------------------------------------------------------------------------------------------------------------------------------------------------------------------------------------------------------------------------------------------------------------------------------------------------------------------------------------------------------------------------------------------------------------------------------------------------------------------------------------------------------------------------------------------------------------------------------------------------------------------------------------------------------------------|
| Multi-organism process                            | <i>PRM1, KAR4, SST2, FLO11, STE12, GPA1, FUS3, FIG1, STE3, STE2, FAR1, STE4, YPS1</i>                                                                                                                                                                                                                                                                                                                                                                                                                                                                                                                                                                                                                                                                                                                                                                                                                                                                                                                                     |
| Multi-organism cellular process                   | <i>PRM1, KAR4, SST2, FLO11, STE12, GPA1, FUS3, FIG1, STE3, STE2, FAR1, STE4, YPS1</i>                                                                                                                                                                                                                                                                                                                                                                                                                                                                                                                                                                                                                                                                                                                                                                                                                                                                                                                                     |
| Reproduction                                      | <i>KAR4, SST2, RIM4, IME2, MSC1, FUS3, HAC1, FIG1, STE3, STE4, YPS1, PRM1, MIH1, ADY2, AQY1, MATalpha1, STE12, GPA1, RME1, FMP45, GSC2, STE2, FAR1</i>                                                                                                                                                                                                                                                                                                                                                                                                                                                                                                                                                                                                                                                                                                                                                                                                                                                                    |
| Positive regulation of reproduction               | <i>SST2, MIH1, GPA1, FUS3, STE3, FAR1, STE4, STE2, YPS1</i>                                                                                                                                                                                                                                                                                                                                                                                                                                                                                                                                                                                                                                                                                                                                                                                                                                                                                                                                                               |
| Response to pheromone                             | <i>KAR4, SST2, STE12, GPA1, FUS3, STE3, STE2, FAR1, STE4, STE6</i>                                                                                                                                                                                                                                                                                                                                                                                                                                                                                                                                                                                                                                                                                                                                                                                                                                                                                                                                                        |
| Unannotated or no paralog in <i>S. cerevisiae</i> | <i>PP7435_Chr4-0336, PMP20, PP7435_Chr1-1387, PP7435_Chr2-1294, PP7435_Chr2-0638, PP7435_Chr1-1388, PP7435_Chr1-0004, PP7435_Chr4-0631, PP7435_Chr1-0252, FLO400, PP7435_Chr3-1224, PpBMT3, PP7435_Chr1-1482, ALS3, PP7435_Chr2-2705, PP7435_Chr2-1097, PP7435_Chr2-0908, PP7435_Chr2-0527, PP7435_Chr2-0423, PP7435_Chr4-0632, PP7435_Chr1-1005, PP7435_Chr4-1007, PP7435_Chr4-0344, PP7435_Chr1-1393, PP7435_Chr2-2540, PP7435_Chr4-1001, PP7435_Chr4-1576, MATa2, PP7435_Chr1-1496, PP7435_Chr2-0355, URC1, PP7435_Chr1-0819, PP7435_Chr1-0236, PP7435_Chr1-1116, PP7435_Chr1-1233, PP7435_Chr2-0522, PP7435_Chr3-1237, PP7435_Chr4-0976, PP7435_Chr1-1117, PEX11C, AYF1, PP7435_Chr3-0480, AOC1, PP7435_Chr3-1545, NU4M, PP7435_Chr3-1710, PP7435_Chr1-0483, PP7435_Chr4-0101, PP7435_Chr1-0172, PP7435_Chr2-0218, AOX1, PP7435_Chr3-0415, QUP4, PP7435_Chr2-1246, PP7435_Chr2-2001, PP7435_Chr1-1165, PP7435_Chr1-1074, PP7435_Chr2-1968, PP7435_Chr4-1014, PP7435_Chr3-1213, PP7435_Chr4-0827, PP7435_Chr2-1495</i> |

**Table S5. Genes proximal to which FAIRE-Seq peaks that undergo stable changes upon switching to slow growth rate were identified (Category I & Category II)**

| CATEGORY           | GENES                                                                                                                                                                                                                                                                                                                                                                                                                                                                                                                                                                                                                                                                                                                                                                                                                                                                                                                                                                                                                                                                                                                                                                                                                                                                                                                                                                                                                                                                                                                                                                                                                                                                                                                                                                                                                                                                                                                                                                                                                                                                                                                                                                                                                                                                                                                                                                                                                                                                                                                                                                                                                                                                                                                       |
|--------------------|-----------------------------------------------------------------------------------------------------------------------------------------------------------------------------------------------------------------------------------------------------------------------------------------------------------------------------------------------------------------------------------------------------------------------------------------------------------------------------------------------------------------------------------------------------------------------------------------------------------------------------------------------------------------------------------------------------------------------------------------------------------------------------------------------------------------------------------------------------------------------------------------------------------------------------------------------------------------------------------------------------------------------------------------------------------------------------------------------------------------------------------------------------------------------------------------------------------------------------------------------------------------------------------------------------------------------------------------------------------------------------------------------------------------------------------------------------------------------------------------------------------------------------------------------------------------------------------------------------------------------------------------------------------------------------------------------------------------------------------------------------------------------------------------------------------------------------------------------------------------------------------------------------------------------------------------------------------------------------------------------------------------------------------------------------------------------------------------------------------------------------------------------------------------------------------------------------------------------------------------------------------------------------------------------------------------------------------------------------------------------------------------------------------------------------------------------------------------------------------------------------------------------------------------------------------------------------------------------------------------------------------------------------------------------------------------------------------------------------|
| <b>CATEGORY I</b>  | <p>PP7435_Chr1-0819, PBP2, PFK2, SSY5, <b>FLO5-1</b>, MNN4-3, LDB19, PMT2, PIB2-2, PP7435_Chr2-1074, MRP1, PEX3, LRP1, PP7435_Chr3-0094, PP7435_Chr3-1161, PP7435_Chr3-1162, PP7435_Chr3-1163, SKN7, SCH9, PSA1-1, PP7435_Chr3-0308, PP7435_Chr3-1688, FBP1, <b>FLO400</b>, HOM3, PP7435_Chr4-1884</p>                                                                                                                                                                                                                                                                                                                                                                                                                                                                                                                                                                                                                                                                                                                                                                                                                                                                                                                                                                                                                                                                                                                                                                                                                                                                                                                                                                                                                                                                                                                                                                                                                                                                                                                                                                                                                                                                                                                                                                                                                                                                                                                                                                                                                                                                                                                                                                                                                      |
| <b>CATEGORY II</b> | <p>KAP104, PP7435_Chr1-0014, PP7435_Chr1-0015, PP7435_Chr1-3402, RPP0, RGP1, RSN1, TEL1, RPL23A, PP7435_Chr1-0148, SNU71, MSB2, PP7435_Chr1-1895, PP7435_Chr1-0287, OSH2, NTE1, PP7435_Chr1-0302, ULP2, PP7435_Chr1-0366, TMA20, IST3, PP7435_Chr1-0365, UTP8, DCG1, RIF1, ADY2-1, RPL12B, MAK10, PP7435_Chr1-0510, AAT1, PP7435_Chr1-0522, PP7435_Chr1-0521, ATP7, PP7435_Chr1-3435, LCD1, RPL37A, PLM2, UBC6, MVD1, AIM29, MGM101, NUM1, PMT4, KTR4, PP7435_Chr1-0825, BRR2, CIR2, NRD1, RCI50, PP7435_Chr1-2599, PP7435_Chr1-0834, ASC1, PP7435_Chr1-2654, HFD1, CHO2, TYW3, GTR2, SPO11, NMA1, RPL34A, MMF1, RCF2, DCW1, DSC2, PAC10, RPS19B, RPL18B, PP7435_Chr1-1180, SNO1, SNZ3, AIM17, PP7435_Chr1-1224, MCA1, PP7435_Chr1-1223, FLR1, GPI1, FRE8, VPS35, RPS29A, TSR1, PP7435_Chr1-1394, PP7435_Chr1-1395, RPS2, NAB2, PP7435_Chr1-1517, RPL36A, MRPL24, GYP5, PP7435_Chr1-1534, TEF2, RAD53, PEP4, PP7435_Chr3-0074, VTI1, MET5, MPC3, TIM8, PP7435_Chr3-0083, ISC1, PP7435_Chr3-0084, GLT1, PWP1, RAO1, DAS2, PP7435_Chr3-0359, GPM1, NSP1, PP7435_Chr3-0376, PP7435_Chr3-0375, PP7435_Chr3-1732, PP7435_Chr3-0374, AQY1, RPS5, BUD2, SEC14, PP7435_Chr3-0704, PP7435_Chr3-0703, YMD8, STP2, PP7435_Chr3-0842, CCC1, PP7435_Chr3-2304, ERG6, VPS53, AIF1-3, PP7435_Chr3-0916, COQ2, RPS30A, PP7435_Chr3-0931, PP7435_Chr3-0932, SOA1_8, YCS4, PP7435_Chr3-0973, MIT1, SAP30, CDC5, PP7435_Chr3-0979, TOP1, RRP9, PP7435_Chr3-1023, RMD5, BIG1, PP7435_Chr3-1115, PP7435_Chr3-1117, TFC6, PP7435_Chr3-1212, PP7435_Chr2-0058, SEC53, RPL10, BUD20, AYR1, GDT1, SUN4, GPC1, PUF4, EFT1, ULP1, EBP2, PP7435_Chr2-1462, INO1, PER1, CBF5, PST1, SAM50-1, PP7435_Chr2-0215, PP7435_Chr2-0218, PEX13, YDC1, PP7435_Chr2-0266, PP7435_Chr2-0293, SOA1_5, NGG1, SDH4, PP7435_Chr2-0296, PP7435_Chr2-0310, CYC3, PDA1, NUP2, RPS25A, PP7435_Chr2-0368, OCA1, OST2, PP7435_Chr2-0366, RSR1, JIP5, RIM9, PP7435_Chr2-0418, MEF1, PUT2, RPS18A, YHP1, PSP1, YML6, ADA2, RPS17B, EGD2, DNF2, LNP1, PP7435_Chr2-0525, STR2, ATP18, DAL2, PP7435_Chr2-0595, VMA11, PP7435_Chr2-0594, ALP100, GAR1, PP7435_Chr2-0634, SAK1, PP7435_Chr2-0642, GFA1, YCG1, DIP2, DCN1, PP7435_Chr2-0680, APC2, GRX6, RPS11B, HAP1, ZTA1, PP7435_Chr2-0965, ASE1, PP7435_Chr2-0985, PP7435_Chr2-0986, ECM4, PP7435_Chr2-0987, MET6, NIK100, GOS1, PKC1, EFT2, UBA2, IDH2, BMH2, ARX1, PP7435_Chr2-1270, YET3, SEC8, NIT1, JLP1-2, PP7435_Chr2-2738, PP7435_Chr2-1290, SLA2-2, SUI1-1, CWC25-1, PP7435_Chr4-0066, CIN5-2, SLA2-1, CWC25-2, SUI1-2, GID7, CUE2, GAL10, PDR12, UTP22, FMS1-2, AOX1, PP7435_Chr4-0143, NOP1, PP7435_Chr4-1224, NCP1, CPS1, CAR1-2, PRO2, ISR1, PP7435_Chr4-0320, GPI11, PP7435_Chr4-0318, UBX3, ADE12, MSS2, LGD1,</p> |

|  |                                                                                                                                                                                                                                                                                                                                                                                                                                                                                                                                                |
|--|------------------------------------------------------------------------------------------------------------------------------------------------------------------------------------------------------------------------------------------------------------------------------------------------------------------------------------------------------------------------------------------------------------------------------------------------------------------------------------------------------------------------------------------------|
|  | PP7435_Chr4-0397, YCK2, PHO86, PP7435_Chr4-0403, SPO75, CRH1, TUB2, VBA1-2, KSS1, PP7435_Chr4-0444, ATM1, MSC2, PP7435_Chr4-0660, MIG1-1, PP7435_Chr4-0680, ARO10-2, NUXM, ABZ2, TRX1, CAX4, PP7435_Chr4-0736, PP7435_Chr4-2159, CEX1, ERG2, RNR2, RPL8A, RIO2, DCP2, RPL8A, DED1, NAM8, CPA1, RPL3, YPQ2, RLM1, KIP2, RPL8A, ERG4, THI11, PP7435_Chr4-0953, RPL8A, LDH1, PP7435_Chr4-1983, HEM14, VID24, UTH1, PP7435_Chr4-0973, PP7435_Chr4-0974, RPL22A, PP7435_Chr4-0976, CYC1, SSY1, PP7435_Chr4-1002, PP7435_Chr4-1001, PP7435_Chr4-1003 |
|--|------------------------------------------------------------------------------------------------------------------------------------------------------------------------------------------------------------------------------------------------------------------------------------------------------------------------------------------------------------------------------------------------------------------------------------------------------------------------------------------------------------------------------------------------|

**Table S6. List of Primers**

The table below lists all the primers used in this study

Primers for Golden Gate Assembly of knock-out cassettes. The restriction sites for Golden Gate Cloning are underlined.

|                |                            |                                                                                                |
|----------------|----------------------------|------------------------------------------------------------------------------------------------|
| <i>flo11Δ</i>  | 5' homologous region FS AB | GATAGGTCTCCGATCGTCAGGAGATTGATGAGATT<br>GATAGGTCTCCCCGGGACTGGTGTAGAAGCAAAA                      |
|                | 3' homologous region FS CD | GATAGGTCTCCAATTCAGTTGCACTTCTCTTCA<br>GATAGGTCTCCAGCTTCCGTTTAAATCACACCC                         |
| <i>flo5-1Δ</i> | 5' homologous region FS AB | GATAGGTCTCCGATCGCTTGAGAAGAAACGGTAGTTTACAATG<br>GATAGGTCTCCCCGGGAAACTTCACGCCTCAACGCAATGCG       |
|                | 3' homologous region FS CD | GATAGGTCTCCAATTAGTCATCAGGCTCTGACTGGGCAG<br>GATAGGTCTCCAGCTCGTATGCAACGGAGCACACGGAACAGTG         |
| <i>flo400Δ</i> | 5' homologous region FS 12 | GATAGAAGACTCGGAGGTAGCGGAATGTGTGAAACTCCAC<br>GATAGAAGACTCCATGGGACTAATTGGCTGTTTATATACCGTG        |
|                | 3' homologous region FS 34 | GATAGAAGACTCGCTTCTCATTGTAGCCACATTGCACAGC<br>GATAGAAGACTCAGCGGAGAGGGCAGGAGCAAAAACTTCATCACATTGAA |
| Marker genes   | FS BC                      | GATAGGTCTCCCCGGGTACGCTGCAGGTGACAAC<br>GATAGGTCTCCAATTAGTGGATCTGATATCACCTA                      |
|                | FS 23                      | GATAGAAGACTCCATGGTACGCTGCAGGTGACAAC<br>GATAGAAGACTCAAGCAGTGGATCTGATATCACCTA                    |

Primers for amplification of split marker cassettes and verification of positive knock-outs

|               |                   |                             |
|---------------|-------------------|-----------------------------|
| <i>flo11Δ</i> | FLO11_KO_ampl_fwd | <b>GTCAGGAGATTGATGAGATT</b> |
|               | NatMX_rev         | TGCGTTGACGTTGGTGAC          |
|               | NatMX_fwd         | GTCCTTCACCACCGACACC         |
|               | FLO11_KO_ampl_rev | TCCGTTTAAATCACACCC          |
|               | FLO11_KO_ctr_fwd  | GTAGGTCGTTACATTTTGTGGCT     |

|                |                    |                                     |
|----------------|--------------------|-------------------------------------|
|                | FLO11_KO_ctr_rev   | ATTGGGACCTGTTAGGGTGACA              |
| <i>flo5-1Δ</i> | FLO5-1_KO_ampl_fwd | GCATCCAAATTGCTTGAGAAGAAACG          |
|                | KanMX_rev          | CAGGAACACTGCCAGCGCATCAAC            |
|                | KanMX_fwd          | GATGTTACAGATGAGATGGTCAGAC           |
|                | FLO5-1_KO_ampl_rev | GAACCGAGTTCATGTAGCAGATGTTAC         |
|                | FLO5-1_KO_ctr_fwd  | GTGATGACAATTCAATACAGGACCCGGT        |
|                | FLO5-1_KO_ctr_rev  | GAAAGTTGTTGGAAGGTCATTGCTC           |
| <i>flo400Δ</i> | FLO400_KO_ampl_fwd | GTAGCGGAATGTGTGAAACTCCAC            |
|                | KanMX_rev          | CAGGAACACTGCCAGCGCATCAAC            |
|                | KanMX_fwd          | GATGTTACAGATGAGATGGTCAGAC           |
|                | FLO400_KO_ampl_rev | GAGAGGGCAGGAGCAAAAACTTCATCACATTGAAG |
|                | FLO400_KO_ctr_fwd  | CAGAATAATAGCGTATAAGGGCTTTCAACACCACG |
|                | FLO400_KO_ctr_rev  | GTGGATGGCTTCTCAGTGGTTGGTGGAGGA      |

Primers for assembling and amplifying donor fragments for *Flo5-1-egfp* and *Flo400-egfp* reporter strains

|             |                             |                                                                                            |
|-------------|-----------------------------|--------------------------------------------------------------------------------------------|
| Flo5-1-egfp | 5' homologous region FS AB  | GGTCTCCGATCGCTCTTCGACGATGCATGCAATTTTCGCAATAG<br>GGTCTCTTACAGCAGCAGCTTGTCCATGTACACCAAGGACAC |
|             | Egfp FS BC                  | GGTCTCCGTGAGCAAGGGCGAGGAGCTGTTC<br>GGTCTCTTTTCAGCAGCAGCCTTGTACAGCTCGTCCATGCCGAGAG          |
|             | 3' homologous region FS CD  | GGTCTCTGAAAGTGGTAACGGTACCACTAGTG<br>GGTCTCTAATTGCTCTTCCGTAGTGGCATCTAGGCTTGTCCAG            |
|             | Donor amplification         | ATGCATGCAATTTTCGCAATAGTTCGTTGC<br>GTGGCATCTAGGCTTGTCCAGCGAGCAC                             |
|             | Confirmation of integration | GTAGTTTCACAATGTGGCAGTTTGATTAC<br>GAAGGTCATTGCTCGCCCAGTAAG                                  |
| Flo400-egfp | 5' homologous region FS AB  | GAAGACCTGGAGGAATGCCGATGGGGTGCATTGATTTTCG<br>GAAGACCTTACAGCAGCAGCATCAGCAAAGGCTG             |
|             | Egfp FS BC                  | GAAGACTCGTGAGCAAGGGCGAGGAGCTGTTC<br>GAAGACCTCAGAAGCAGCAGCCTTGTACAGCTCGTCCATGCCGAG          |



|                                         |                                                                             |
|-----------------------------------------|-----------------------------------------------------------------------------|
| 3' homologous region<br>Fragment 1 FS C | GAAGACCTTCTGGAGAGTTCACTCTTTGGAAC<br>GAAGACCTTGTTGTCTCGTCGTCCTCCTCTGG        |
| 3' homologous region<br>Fragment 2 FS D | GAAGACTCAACAACAACCGATGATCCAACCG<br>GAAGACCTAGCGGAATGCGAATACAGTGTTAATAATAAGC |
| Donor amplification                     | GGCAAAGTCTTGAGGAGGTGCAAAAACGG<br>AGTAGCACCAGTAATTTTTATGTCGGAAGGAGGGAAGGTTG  |
| Confirmation of integration             | GTCGTTACATTTTGTGGCTATAATCG<br>GGTCTCTAATTGAAGACTACCCAAG                     |

### qRT PCR primers

|               |                                                                |
|---------------|----------------------------------------------------------------|
| <i>FLO11</i>  | AGTCCACACACCATTGACAACCTGC<br>ACACCAGTAACTATTGTAGCAACTGAGC      |
| <i>FLO5-1</i> | CAGGCAAGTGATGACAATTCAATACAGGAC<br>CGTTTGGTATCCCATAAAGTGTGTGGTG |
| <i>FLO5-2</i> | GCTATTTCAAAGCTGCTGTTTCAGGAGAC<br>AGCGAATAGTCTGTTGGTGCTTGATCC   |
| <i>FLO400</i> | GGAGCTGAAGGTTTCGGTAGAAT<br>GTTCTGCACCCTCACAAATGT               |
| <i>FLO100</i> | TCACGACCGGTGGTACGACTA<br>ATTTGGCACAACGTGGCTAGGT                |
| <i>FLO200</i> | GTCTGGGACAAGTGACAACA<br>ATGGTTGCATTCACGTACGA                   |
| <i>BSC1</i>   | TGAGGAATCCACAGAGGAATCCACAT<br>TGGATTCCCTCAGCATCCTCAGTAGA       |
| <i>ACT1</i>   | CCTGAGGCTTTGTTCCACCCATCT<br>GGAACATAGTAGTACCACCGGACATAACGA     |

## Supplementary figures

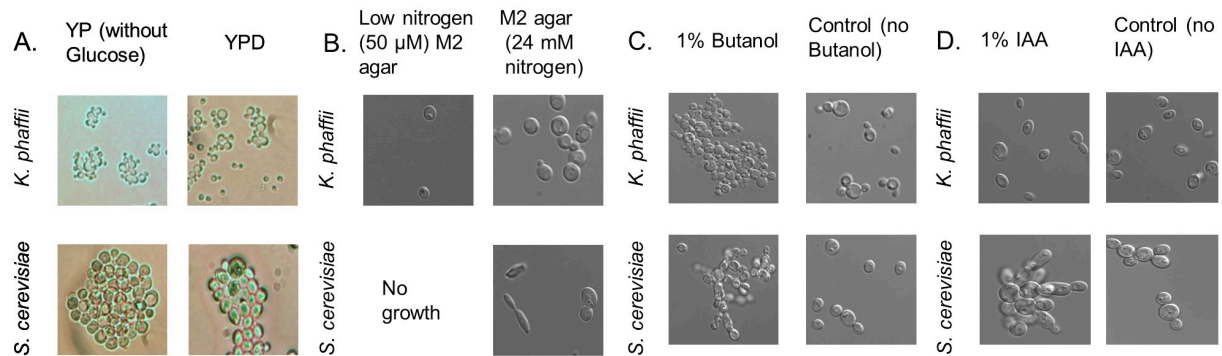

**Fig. S1.** *K. phaffii* does not switch to pseudohyphal phenotype when cultivated under conditions that are able to trigger pseudohyphal differentiation in *S. cerevisiae*. The above figures show microscope pictures of *K. phaffii* and *S. cerevisiae* after cultivation under different conditions. (A) YP agar (without glucose) and YPD (with glucose) (B) Standard and low nitrogen containing minimal agar (C) In presence of 1% butanol D. In presence of 1% isoamyl alcohol

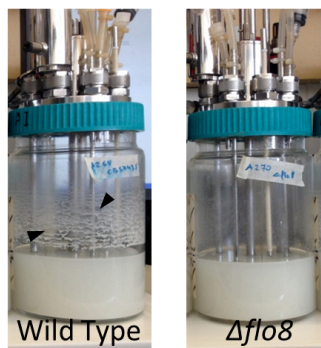

**Fig. S2.** Surface growth on bioreactors observed in the wild-type samples at slow growth rates. Surface growth was observed on the walls of the bioreactor when the dilution rate was switched to  $0.05 \text{ h}^{-1}$  for the wild-type strain. In case of the  $\Delta flo8$  strain this phenotype was not observed suggesting that the transcription factor Flo8 controls this phenotype.

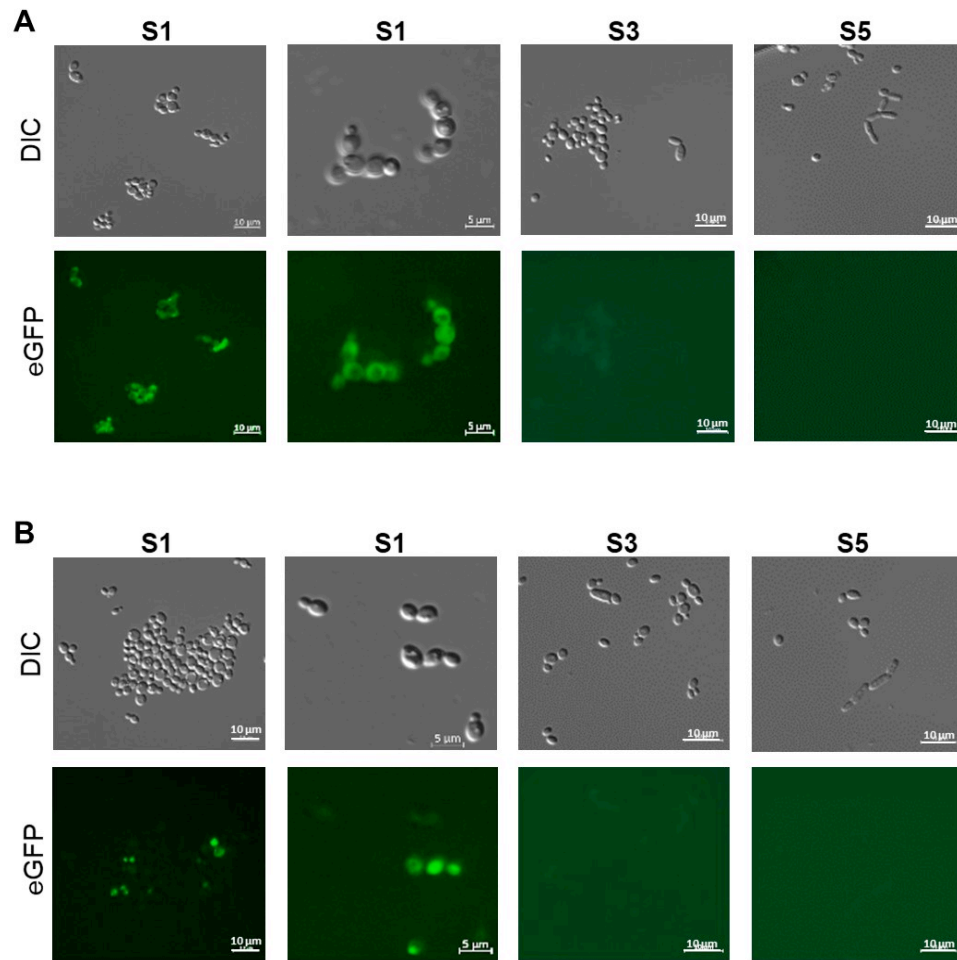

**Fig. S3.** Microscope pictures showing the expression of Flo5-1 and Flo400 by Flo5-1:eGFP and Flo400-eGFP expressing reporter strains. The upper panel shows the DIC image and the lower panel shows the corresponding eGFP image.

Visualization of (A) Flo400:eGFP and (B) Flo5-1:eGFP at the three different sampling points S1, S3 and S5, and a zoom at S1 for better visualization. Absence of fluorescence at S3 and S5 in both (A) and (B) indicates that the proteins are not expressed at these sampling time points

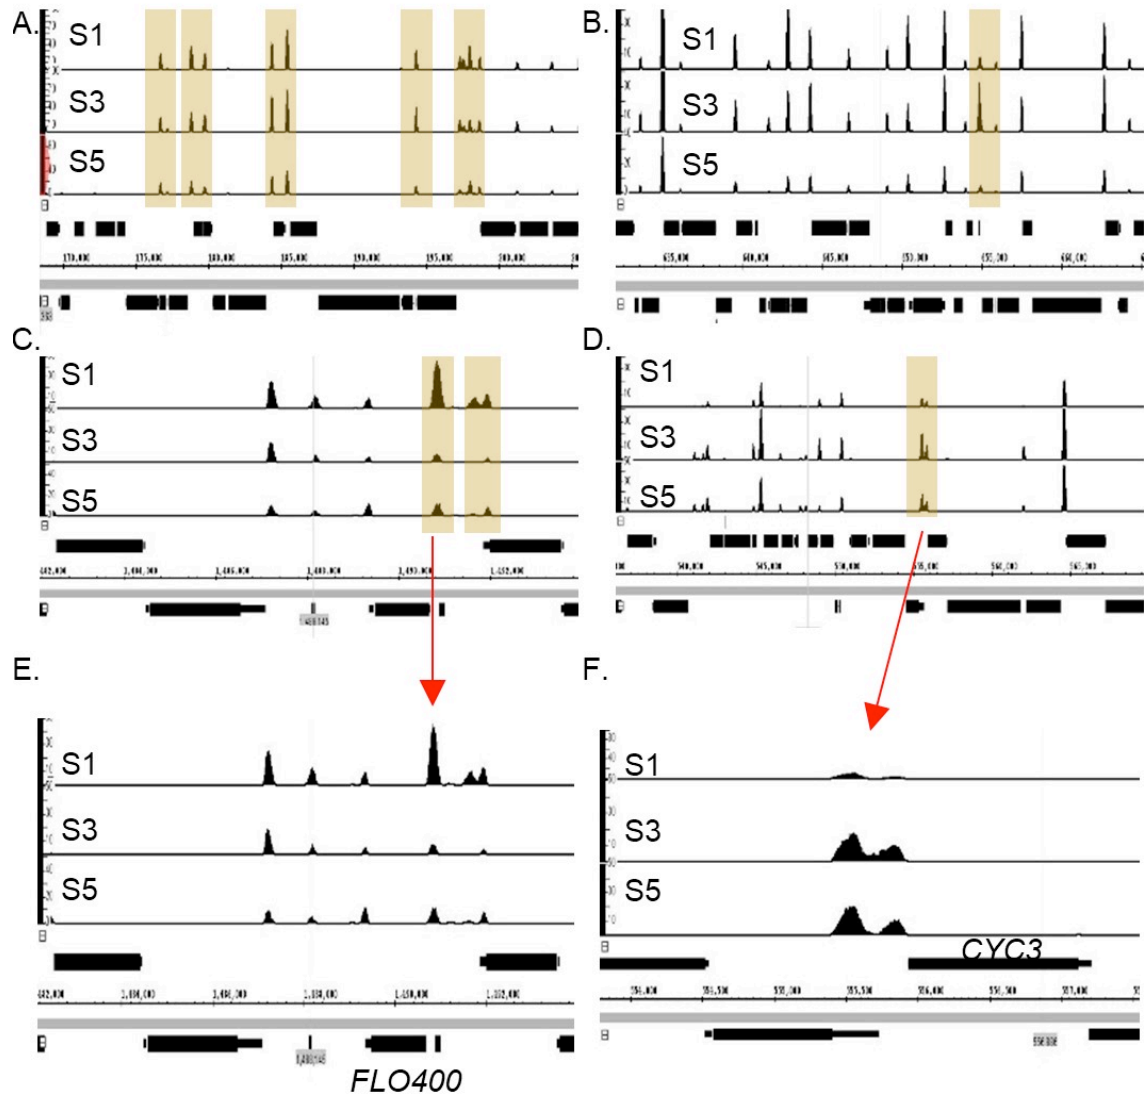

**Fig. S4.** Screenshots of Integrated Genome Browser (IGB) showing various chromosome regions representing different types of peaks encountered in the FAIRE-Seq data. S1, S3 and S5 are the three sampling time-points. (A) Peaks that do not change over the different stages of chemostat; (B) Peaks that are not detected in S1 and S5 but only detected in S3; (C,E) Peaks that are detected at S1, but not at S3 and S5 (corresponding to chromatin regions that are stably closed after switching to the slow  $\mu$  = Category I, e.g. *FLO400*); and (D,F) Peaks that are not detected at S1, but appear in S3 and S5 (corresponding to stably opened chromatin regions after switching to the slow  $\mu$  = Category II, e.g. *CYC3*).
